# Supplementary material for: Quantifying Coexistence Concentrations in Multi-Component Phase-Separating Systems Using Analytical HPLC
Source: MDPI journal article supplement (doi:10.3390/biom12101480), 2022-10-14
Supplement: s1 [file s1]

## Supplementary Materials

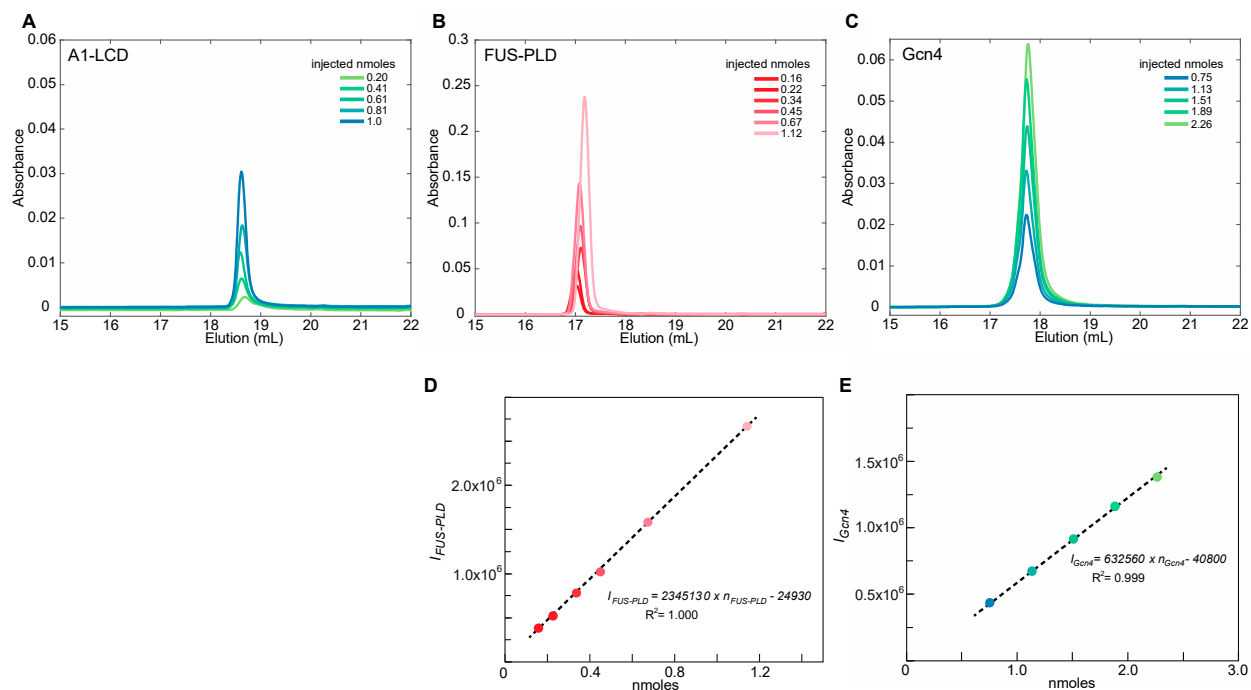

**Figure S1.** HPLC elution profile of (A) A1-LCD, (B) FUS-PLD and (C) Gcn4 were used to generate respective standard curves (D) and (E), where the ordinate is the area under the HPLC elution peak, and the abscissa is  $n$ , given in nmoles. For the A1-LCD standard curve, see Fig. 2.

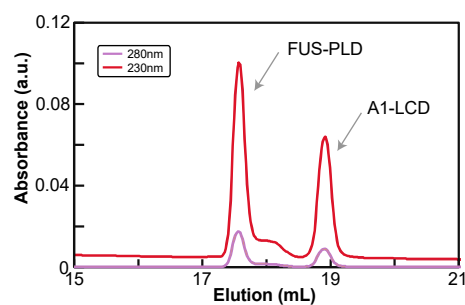

**Figure S2.** HPLC elution profile of A1-LCD and FUS-PLD monitored at 230 and 280 nm.
